# Supplementary material for: Aquilaria sinensis: An Upstart Resource for Cucurbitacin Production Offers Insights into the Origin of Plant Bitter (Bi) Gene Clusters
Source: Plants (Basel). 2024 Jan 16;13(2):260. doi: 10.3390/plants13020260 (PMC10819951; doi:10.3390/plants13020260)
Supplement: Supplementary file 1 [file plants-13-00260-s001.zip › Table S1.xlsx]

## Sheet: Sheet1
Table S1. The protein sequences of Bi genes used in this study.
Gene ID	Protein sequence
As03G2784	MWRLKTGSETVGDNGRWLRSTNNHVGRQVWEFFPEMGSPEELVAIEAAHREFHLNRFHKQHSSDLLMRLQYEREKPCVQKEGAVRLDATETPTEAAVETTLRRALTFYSTMQSDDGHWANDLGGPMFLLPGLVITLTITGTINVVLSKEHQREIRRYLYNHQNQDGGWGLHIEGPSTMFGSALNYVTLRLLGEGPDDGEGAMERARQWILSRGGAVAVTSWGKLWLSVLGVYEWDGNNPLPPELWLLPYSLPLHPGRMWCHCRMVYLPMSYLYGKRFVGPITPTVLSLREELYPIPYHHVDWNKARNTCAQDDLYYPHPFVQDLLWGSLYHVYEPLVMRWPGKRLRERALQHVMKHIHYEDENTEYICLGPVNKALNMLCCWVEDPHSEAFKMHIPRIY…
Bl06G0155	MWRLKTGEESVGENGKWMRSVNNHLGRQVWVFSPDHTCIEDQLKVENARSTFTCYRHQKKQCSDLLMRFQFAEETKKCSSPNLPLVRVEEDEQVTDEMVETILQKAVNFYTTIQAADGHWSHDLGGPMFLLSGLVISLYVTGALNAVLSVQHQREICRYLYNHQANEDGGWGLHIEGDSTMFGTGLNYVTLRLLGEESNGDALNPLERGRLWILNHGGATAITSWGKLWLSVLGAYDWSGNNPLPPEFWLFPDFVPWHPGKMWCHCRMVYLPMSYLYGKRFVGPITPTVLSLRKELYTLPYHEIDWNKARNTCAKEDLYYPHSFLQDLLWGSLHHVAENIFTRWPGSKLREKALRTVMEHIHYEDQSTRYICLGPVSKALNMLCCWVEDSNSEAFKLHL…
Bm15G0736	MWTLKTGEESVGENGKWLRSVNNHLGRQVWEFSPDHTSIEDQLEVEDARSTFTRHRHQKKQCSDLLMRFQFAEETKNCSSPNLPLVRVEEDEQVTEEIVKTILQKSVNFYSTIQAADGHWSHDLGGPMFLLPGLVISLYVTGALKAVLSIQHQREICRYFVHGMQNEDGGWGLHIEGESTMFGTGLNYVTLRLLGEESNGESLNPLERGRLWILNHGGATTITSWGKLWLSVLGAYDWSGNNPLPPEFWLFPDIVPWHPGKMWCHCRMVYLPMSYLYGKRFVGPITPTVLSLRRELYPLPYHDIDWNKARNTCAKEDLYYPHPFLQDLLWGSLHHVAEPVFTRWPGSKLREKALRTVMEHIHYEDQSTRYICLGPVSKALNMLCCWVEDPNSEAFKLHL…
Bp10G0300	MWRLKTGEDSVGENGKWLRSVNNHLGRQVWEFSPDHTSIEDQLEVEDARSTFTRHRHQKKQCSDLLMRFQFAEETKNCSSPNLPLVRVEEDEQVTDEMVKTILQKAVNFYSTIQAADGHWSHDLGGPMFLLPSLVRNQRCKATFSREIPSNMNWFGFNSCKQNEDGGWGLHIEGESTMFGTGLNYVTLRLLGEESNGESLNPLERGRLWILNHGGATAITSWGKLWLSVLGAYDWSGNNPLPPEFWLFPDFVPWHPGKMWCHCRMVYLPMSYLYGKRFVGPITPTVLSLRRELYTLPYQDIDWNKARNTCAKEDLYYPHPFLQDLLWGSLHHVAEPIFGRWPGSKLREKALRTVMEHIHYEDQSTRYICLGPVSKALNMLCCWVEDPNSEAFKLHLPRI…
Bd10G0439	MWRLKTGEESVGENGKWLRSVNNHLGRQVWEFSPDHTSIEDQLEVEDARSTFTRHRHQKRQCSDLLMRFQFAEETKNCSSPNLPLVRVEEDEQVTDEMVKTILQKAVNFYSTIQAADGHWSHDLGGPMFLLPGLVISLYVTGALKAVLSIQHQQEICRYLYNHQNEDGGWGLHIEGESTMFGTGLNYVTLRLLGQESNGEALNPLERGRLWILNHGGATAITSWGKLWLSVLGAYDWSGNNPLPPEFWLFPDLVPWHPGKMWCHCRMVYLPMSYLYGKRFVGPITPTVLSLRRELYTLPYHDIDWNKARNTCAKEDLYYQHPFLQDLLWGSLHHVAEPIFTRWPGSKLREKALRTVMEHIHYEDQSTRYICLGPVSKALNMLCCWVEDPNSEAFKLHLP…
Sg48S105	MWRLKVGAESVGENDEKWLKSISNHLGRQVWEFCPDAGTQQQLLQVHKARKAFHDDRFHRKQSSDLFITIQYGKEVENGGKTAGVKLKEGEEVRKEAVESSLERALSFYSSIQTSDGNWASDLGGPMFLLPGLVIALYVTGVLNSVLSKHHRQEMCRYVYNHQNEDGGWGLHIEGPSTMFGSALNYVALRLLGEDANAGAMPKARAWILDHGGATGITSWGKLWLSVLGVYEWSGNNPLPPEFWLFPYFLPFHPGRMWCHCRMVYLPMSYLYGKRFVGPITPIVLSLRKELYAVPYHEIDWNKSRNTCAKEDLYYPHPKMQDILWGSLHHVYEPLFTRWPAKRLREKALQTAMQHIHYEDENTRYICLGPVNKVLNLLCCWVEDPYSDAFKLHLQRVHD…
Mc07G0004	MWRLKVGAESVGENDEKWVKSISNHLGRQVWEFCPDAGTPQQLLQIEKARKAFQDNRFHRKQTSDLLVSIQCEKGTTNGARVPGTKLKEGEEVRKEAVKSTLERALSFYSSIQTSDGNWASDLGGPMFLLPGLVIALCVTGALNSVLSKHHRQEMCRYLYNHQARVTVTVTVCVLQNEDGGWGLHIESPSTMFGSALNYVALRLLGEDADGGEGRAMTKARAWILGHGGATAITSWGKLWLSVLGVYEWSGNNPLPPEFWLLPYFLPFHPGRMWCHCRMVYLPMSYLYGKRFVGPITPVVLSLRKELYTVPYHEIDWNKSRNTCAKEDLYYPHSKMQDILWGSIHHMYEPLFTHWPAKRLREKALKTAMQHIHYEDENTRYICLGPVNKVLNMLCCWVE…
Hp03G1192	MWRLKVGAESVGEKNEKWVKSVTNHLGRQIWEFCPDAGTPEQLLQVEKARRDFRDNRLRRKQSSDLFLAIQYEKEIGNVAKLGGIKLKEGEEVRKEAVKSTLERALSFYSAVQTSDGNWASDLGGPMFLLPGLVISLHVTGALNSVLSKHHRHEMCRYLYNHQNEDGGWGLHIEGQSTMFGSALNYVALRLLGEDADGGDGGAMTKARAWILDRGGATAITSWGKLWLSVLGVYEWSGNNPLPPEFWILPYFLPFHPGRMWCHCRMVYLPMSYLYGKRFVGPITPVVLSLRKELYTLPYHEVDWNKSRNTCAKEDLYYPHPKMQDILWGSIHHVYEPLFTHWPGKRLREKALQTAMKHIHYEDENTRYICLGPVNKVLNMLCCWVEDPFSDAFKLHLQR…
Lc05G0790	MWKLKVGAESAGEKNEKWLKSISNHLGRQVWEFCPDAAAPHHQLQLHNARKHFHHNRFSRKQSSDLLLAIQYEKEIANGAKVAAIKLKEGEEVRKEAVKITLERALGFYSAIQTPDGNWASDLGGPIFLIPGLVIALYVTGALNSILSKHHRQEMCRYLYNHQNEDGGWGLHIEGPSTMFGSGLNYVALRLLGEDADGGEGGAMTKARAWILARGGATAIPSWGKLWLSVLGVYEWSGNNPLPPEFWLLPYSLPFHPGRMWCHCRMVYLPMSYLYGKRFVGPITPIVLSLRKELFTIPYHEIDWNKSRNTCAKEDLFYPHPKMQDILWGSLHHLYEPLFSRWPGKRIREKALQTAMQHIHYEDENTRYICLGPVNKVLNMLCCWVEDPYSDAFKLHLQR…
Ta06G1009	MWRLKVGGESVGEKEEKWVKSISNHLGRQVWEFCPHDGTPEQRLQVQKARDAFRINRFRRKQSSDLFLAIQYEKEIANGATVGGIKLKEGDEVRKEAVKSTLERALNFYSAVQTTDGNWASDLGGPMFLLPGLVIALYVTGVLNSVLSKNHRQEMCRYLYNHQNEDGGWGLHIEGPSTMFGSALNYVALRLLGEDADGGDGGAMTKARAWILDRGGATAITSWGKLWLSVLGVYEWSGNNPLPPEFWLLPYFLPFHPGRMWCHCRMVYLPMSYLYGKRFVGPITPIVLSLRKELYTVPYHEVDWNKSRNTCAKEDLYYPHPKMQDILWGSIHHVYEPLFSRWPGKRLREKALQSAMQHIHYEDENTRYICLGPVNKVLNMLCCWVEDPYSDAFKLHLQR…
Se07G0102	MQNEDGGWGLHIEGSSTMFGSALNYVALRLLGEDVDGGDGGAMTKGRAWILDRGSATAITSWGKLWLSVLGVYEWSGNNPLPPEFWLLPYSLPFHPGRMWCHCRMVYLPMSYLYGKRFVGPITPIVLSLRKELYTVPYHEIDWNKSRNTCAKEDLYYPHPKVQDILWGTIHHVYEPLFSGWPCKRLREKALQAAMKHIHYEDENSNYICLGPVNKVLNMLCCWVEDPYSDAFKLHLQRIHDFLWVSEDGMKMQGYNGSQLWDTAFSIQAIASTKLVDTYGHSLRKAHNFVKNSQIQQDCPGDSNVWFRHIHKGAWPFSTRDHGWLISDCTAEGLKASLTLSKLPSQLVGEPLEKNRLYDAVNVLLSLQNENGGFASYELTRSYPWLELINPAETFGDIV…
Cme11G2385	MWRLKVGKESVGEKEEKWIKSISNHLGRQVWEFCSGENENDDDEAIAVANNSASKFENARNHFRNNRFHRKQSSDLFLAIQCEKEIIRNGAKNEGTTKVKEGEDVKKEAVKNTLERALSFYSAVQTSDGNWASDLGGPMFLLPGLVIALYVTGVLNSVLSKHHRQEMCRYIYNHQNEDGGWGLHIEGSSTMFGSALNYVALRLLGEAADGGEHGAMTKARSWILERGGATAITSWGKLWLSVLGVYEWSGNNPLPPEFWLLPYSLPFHPGRMWCHCRMVYLPMSYLYGKRFVGPITPIVLSLRKELYTIPYHEIDWNRSRNTCAKEDLYYPHPKMQDILWGSIYHVYEPLFSGWPGKRLREKAMKIAMEHIHYEDENSRYICLGPVNKVLNMLCCWVED…
Cs06G0758	MWRLKVGKESVGEKEEKWIKSISNHLGRQVWEFCAENDDDDDDEAVIHVVANSSKHLLQQQRRQSSFENARKQFRNNRFHRKQSSDLFLTIQYEKEIARNGAKNGGNTKVKEGEDVKKEAVNNTLERALSFYSAIQTSDGNWASDLGGPMFLLPGLVIALYVTGVLNSVLSKHHRQEMCRYIYNHQNEDGGWGLHIEGSSTMFGSALNYVALRLLGEDANGGECGAMTKARSWILERGGATAITSWGKLWLSVLGVYEWSGNNPLPPEFWLLPYSLPFHPGRMWCHCRMVYLPMSYLYGKRFVGPITHMVLSLRKELYTIPYHEIDWNRSRNTCAQEDLYYPHPKMQDILWGSIYHVYEPLFNGWPGRRLREKAMKIAMEHIHYEDENSRYICLGPVNK…
Ch11G1678	MWRLKVGKDSVGEKEEKWIKSISNHLGRQVWEFCAENDDDDDEAIIHVVANSSEHLLQQQRQRRQSSIENARKQFRNNRFHRKQSSDLFLAIQYEKEIARNGAKNGGTTKVKEGEDVKKEANEDGGWGLHIEGSSTMFGSALNYVALRLLGEDADGGECGAMTKARSWILERGGATAITSWGKLWLSVLGVYEWSGNNPLPPEFWLLPYSLPFHPGRMWCHCRMVYLPMSYLYGKRFVGPITPIVLSLRKELYTIPYHEIDWNRSRHTCAQYCLVNYVKTDDFENGYIMQEDLYYPHPKMQDILWGSIYHVYEPLFTGWPGKRLREKAMKIAMEHIHYEDENSRYICLGPVNKVLNMLCCWVEDPYSDAFKFHLQRIPDYLWLAEDGMRMQGYNGSQLW…
Cl06G0157	MWRLKVGAESVGEKEEKWLKSISNHLGRQVWEFCAHQPTASPNHLQQIDNARNHFRNNRFHRKQSSDLFLAIQNEKEIANVTKGGGIKVKEEEDVRKETVKNTVERALSFYSAIQTNDGNWASDLGGPMFLLPGLVIALYVTGVLNSVLSKHHRQEMCRYLYNHQNEDGGWGLHIEGTSTMFGSALNYVALRLLGEDADGGEGGAMTKARSWILDRGGATAITSWGKLWLSVLGVYEWSGNNPLPPEFWLLPYCLPFHPGRMWCHCRMVYLPMSYLYGKRFVGPITPIVLSLRKELYTIPYHEIDWNRSRNTCAKEDLYYPHPKMQDILWGSIYHLYEPLFTRWPGKRLREKALQMAMKHIHYEDENSRYICLGPVNKVLNMLCCWVEDPYSDAFKFHL…
Cma17G1388	MWRLKVGAESVGEKDEKWVKSVSNHLGRQVWEFCADAAADTPHQLLQIQNARNHFHHNRFHRKQSSDLFLAIQYEKEIAKGAKGGAVKVKEGEEVGKEAVKSTLERALGFYSAVQTSDGNWASDLGGPMFLLPGLVIALHVTGVLNSVLSKHHRVEMCRYLYNHQNEDGGWGLHIEGTSTMFGSALNYVALRLLGEDADGGDGGAMTKARAWILERGGATAITSWGKLWLSVLGVYEWSGNNPLPPEFWLLPYSLPFHPGRMWCHCRMVYLPMSYLYGKRFVGPITPKVLSLRQELYTIPYHEIDWNKSRNTCAKEDLYYPHPKMQDILWGSIYHVYEPLFTRWPGKRLREKALQAAMKHIHYEDENSRYICLGPVNKVLNMLCCWVEDPYSDAFKLHL…
Cp12G001180	SKVDNMWRLKVGAESVGEKDEKWVKSVSNHLGRQVWEFCAADAAAVTPHQLLQIQNARNHFHRNRFHRKQSSDLFLAIQYEKEIAKGGKGKEAVKVKEGEEVGKEAVKSTLERALSFYTAVQTSDGNWASDLGGPMFLLPGLVIALYVTGVLNSVLSKHHRNEDGGWGLHIEGTSTMFGSALNYVALRLLGEDADGGDDGAMTKARAWILERGGATAITSWGKLWLSVLGVYEWSGNNPLPPEFWLLPYSLPFHPGRMWCHCRMVYLPMSYLYGKRFVGPITPKVLSLRQELYTVPYHEIDWNKSRNTYPYSDAFKLHLQRVHDYLWVAEDGMRMQGYNGSQLWDTAFSIQAIVATKLVDSYAPTLRKAHDFVKDSQIQEDCPGDPNLINPAETFGDIV…
Ca17G1281	MWRLKVGAESVGEKDEKWVKSVSNHLGRQVWEFCADAAAATPQQLLQIQNARNHFHRNRFHRKQSSDLFLAIQYEKEIAKGGKGGAVKVKEEEEVGKEAVKSTLERALSFYSAVQTSDGNWASDLGGPMFLLPGLVIALYVTGVLNSVLSKHHRVEMCRYLYNHQNEDGGWGLHIEGTSTMFGSALNYVALRLLGEDADGGDDGAMTKARAWILERGGATAITSWGKLWLSVLGVYEWSGNNPLPPEFWLLPYSLPFHPGRMWCHCRMVYLPMSYLYGKRFVGPITPKVLSLRQELYTVPYHEIDWNKSRNTCAKEDLYYPHPKMQDILWGSIYHVYEPLFTRWPGKRLREKALQTAMKHIHYEDENSRYICLGPVNKVLNMLCCWVEDPYSDAFKLHL…
Cmo17G1341	MWRLKVGAESVGEKDEKWVKSVSNHLGRQVWEFCADAAAAATPRQLLQIQNARNHFHRNRFHRKQSSDLFLAIQYEKEIAEGGKGGAVKVKEEEEVGKEAVKSTLERALSFYSAVQTSDGNWASDLGGPMFLLPGLNEDGGWGLHIEGTSTMFGSALNYVALRLLGEDADGGDDGAMTKARAWILERGGATAITSWGKLWLSVLGVYEWSGNNPLPPEFWLLPYSLPFHPGRMWCHCRMVYLPMSYLYGKRFVGPITPKVLSLRQELYTVPYHEIDWNKSRNTCAKEDLYYPHPKMQDILWGSIYHVYEPLFTRWPGKRLREKALQTAMKHIHYEDENSRYICLGPVNKVLNMLCCWVEDPYSDAFKLHLQRVHDYLWVAEDGMRMQGYNGSQLWDTAF…
